# Supplementary material
Source: MDPI journal article supplement (https://www.mdpi.com/2075-163X/14/1/114)
Supplement: s1 [file s1]

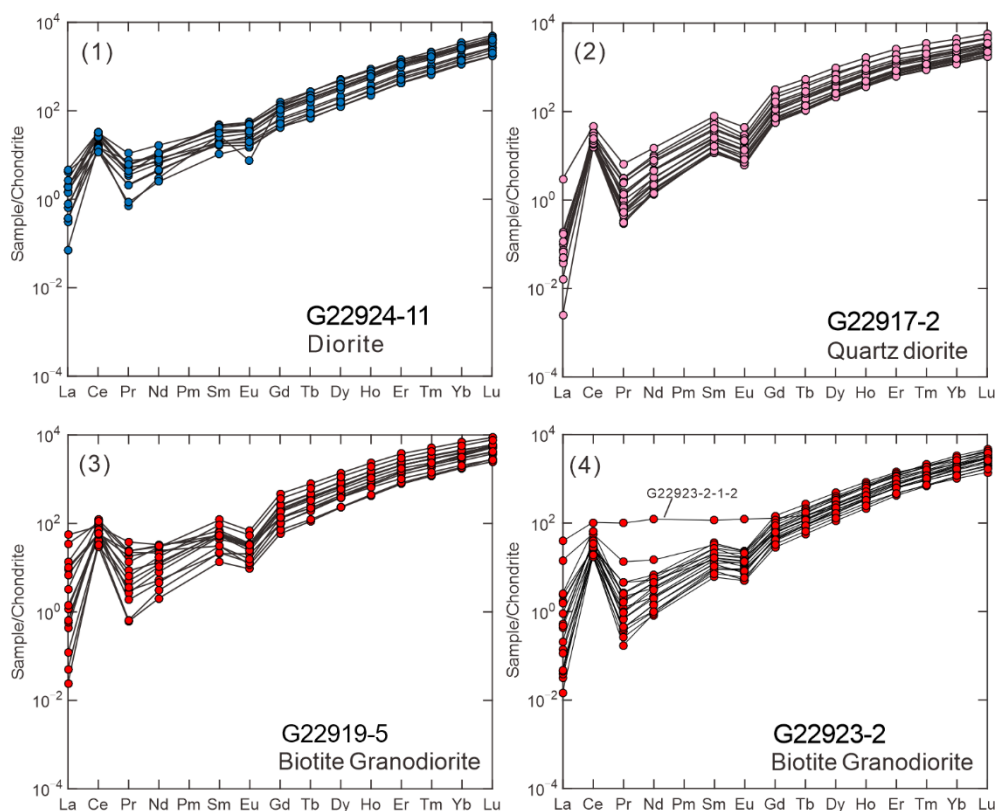

Figure S1 Chondrite-normalized REE patterns of analyzed zircons in this study. (1) The northern Qingshan diorite; (2) The Heishantou quartz diorite; (3, 4) The southern Qingshan biotite granodiorites.
